# Supplementary material for: Coordination engineering of atomically dispersed zirconium on graphene for the oxygen reduction reaction
Source: Royal Society of Chemistry journal article supplement (doi:10.1039/d3cp03728b), 2023-01-01
Supplement: d3cp03728b1.pdf [file d3cp03728b1.pdf]

## **Electronic Supplementary Information for Coordination engineering of atomically dispersed zirconium on graphene for oxygen reduction reaction**

Jessie Manopo,<sup>ab</sup> Pangeran Niti Kusumo,<sup>a</sup> Afriyanti Sumboja<sup>c</sup> and Yudi Darma<sup>\*ab</sup>

a. Quantum Semiconductor and Devices Laboratory, Department of Physics, Faculty of Mathematics and Natural Sciences, Institut Teknologi Bandung, Jalan Ganesha 10 Bandung, 40132, Indonesia.

b. Research Collaboration Center for Quantum Technology 2.0, Bandung 40132, Indonesia

c. Material Science and Engineering Research Group, Faculty of Mechanical and Aerospace Engineering, Institut Teknologi Bandung, Jalan Ganesha 10 Bandung, 40132, Indonesia

### **Detailed computational methods**

#### *Searching of most favorable adsorption sites*

Due to chemically stable  $\pi$  conjugation in  $sp^2$ -hybridized carbons<sup>1</sup>, we suggested that the adsorption sites will be located near the O-Zr-N<sub>4</sub> site. We have search all possible adsorption site near the O-Zr-N<sub>4</sub> site with the help of Pymatgen package<sup>2</sup>. It is found that the oxygen-containing intermediates preferred to be adsorbed in the Zr atom due to high electronegativity difference between O and Zr.

#### *Detailed calculation of Gibbs free energy*

Due to the difficulties in calculating the exact energy of \*OH, and \*OOH, the Gibbs free energy of  $\Delta G_{*O}$ ,  $\Delta G_{*OH}$ , and  $\Delta G_{*OOH}$  were calculated relatively to the Gibbs free energy of a number of H<sub>2</sub>O (g) and H<sub>2</sub> (g):

$$\begin{aligned}
\Delta G_{*O} &= \Delta G(H_2O(g) + * \rightarrow O^* + H_2(g)) \\
&= G_{*O} + G_{H_2} - G_{H_2O} - G_* \\
&= (E_{*O} + E_{H_2} - E_{H_2O} - E_*) + (E_{ZPE(*O)} + E_{ZPE(H_2)} - E_{ZPE(H_2O)} - E_{ZPE(*)}) - T(S_{*O} + S_{H_2} - S_{H_2O} - S_*)
\end{aligned}$$

$$\begin{aligned}
\Delta G_{*OH} &= \Delta G(H_2O(g) + * \rightarrow OH^* + \frac{1}{2}H_2(g)) \\
&= G_{*OH} + \frac{1}{2}G_{H_2} - G_{H_2O} - G_* \\
&= (E_{*OH} + \frac{1}{2}E_{H_2} - E_{H_2O} - E_*) + (E_{ZPE(*OH)} + \frac{1}{2}E_{ZPE(H_2)} - E_{ZPE(H_2O)} - E_{ZPE(*)})
\end{aligned}$$

$$\begin{aligned}
\Delta G_{*OOH} &= \Delta G(2H_2O(g) + * \rightarrow OOH^* + \frac{3}{2}H_2(g)) \\
&= G_{*OOH} + \frac{3}{2}G_{H_2} - 2G_{H_2O} - G_* \\
&= (E_{*OOH} + \frac{3}{2}E_{H_2} - 2E_{H_2O} - E_*) + (E_{ZPE(*OOH)} + \frac{3}{2}E_{ZPE(H_2)} - 2E_{ZPE(H_2O)} - E_{ZPE(*)})
\end{aligned}$$

The temperature were taken as 298.15 K. The entropy and ZPE of gas molecules of H<sub>2</sub>, H<sub>2</sub>O, and H<sub>2</sub>O<sub>2</sub> were obtained from standard values. The entropy of adsorbates and adsorption sites were neglected. The ZPE of adsoption sites were neglected. ZPE of adsorbates were calculated from vibrational frequencies calculation (ph.x).

To calculate the 2e<sup>-</sup> mechanism, the following reaction were considered

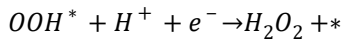

The Gibbs free energy change of the process is:

$$\begin{aligned}
\Delta G &= \Delta G(OOH^* + H^+ + e^- \rightarrow H_2O_2 + *) \\
&= G_{H_2O_2} + G_* - (G_{*OOH} + G_{H^+} + \mu_{e^-}) \\
&= G_{H_2O_2} + G_* - (G_{*OOH} + \frac{1}{2}G_{H_2})
\end{aligned}$$

Table S1. Relaxed structures of all active sites and their corresponding formation energy calculated with respect to their pristine structures

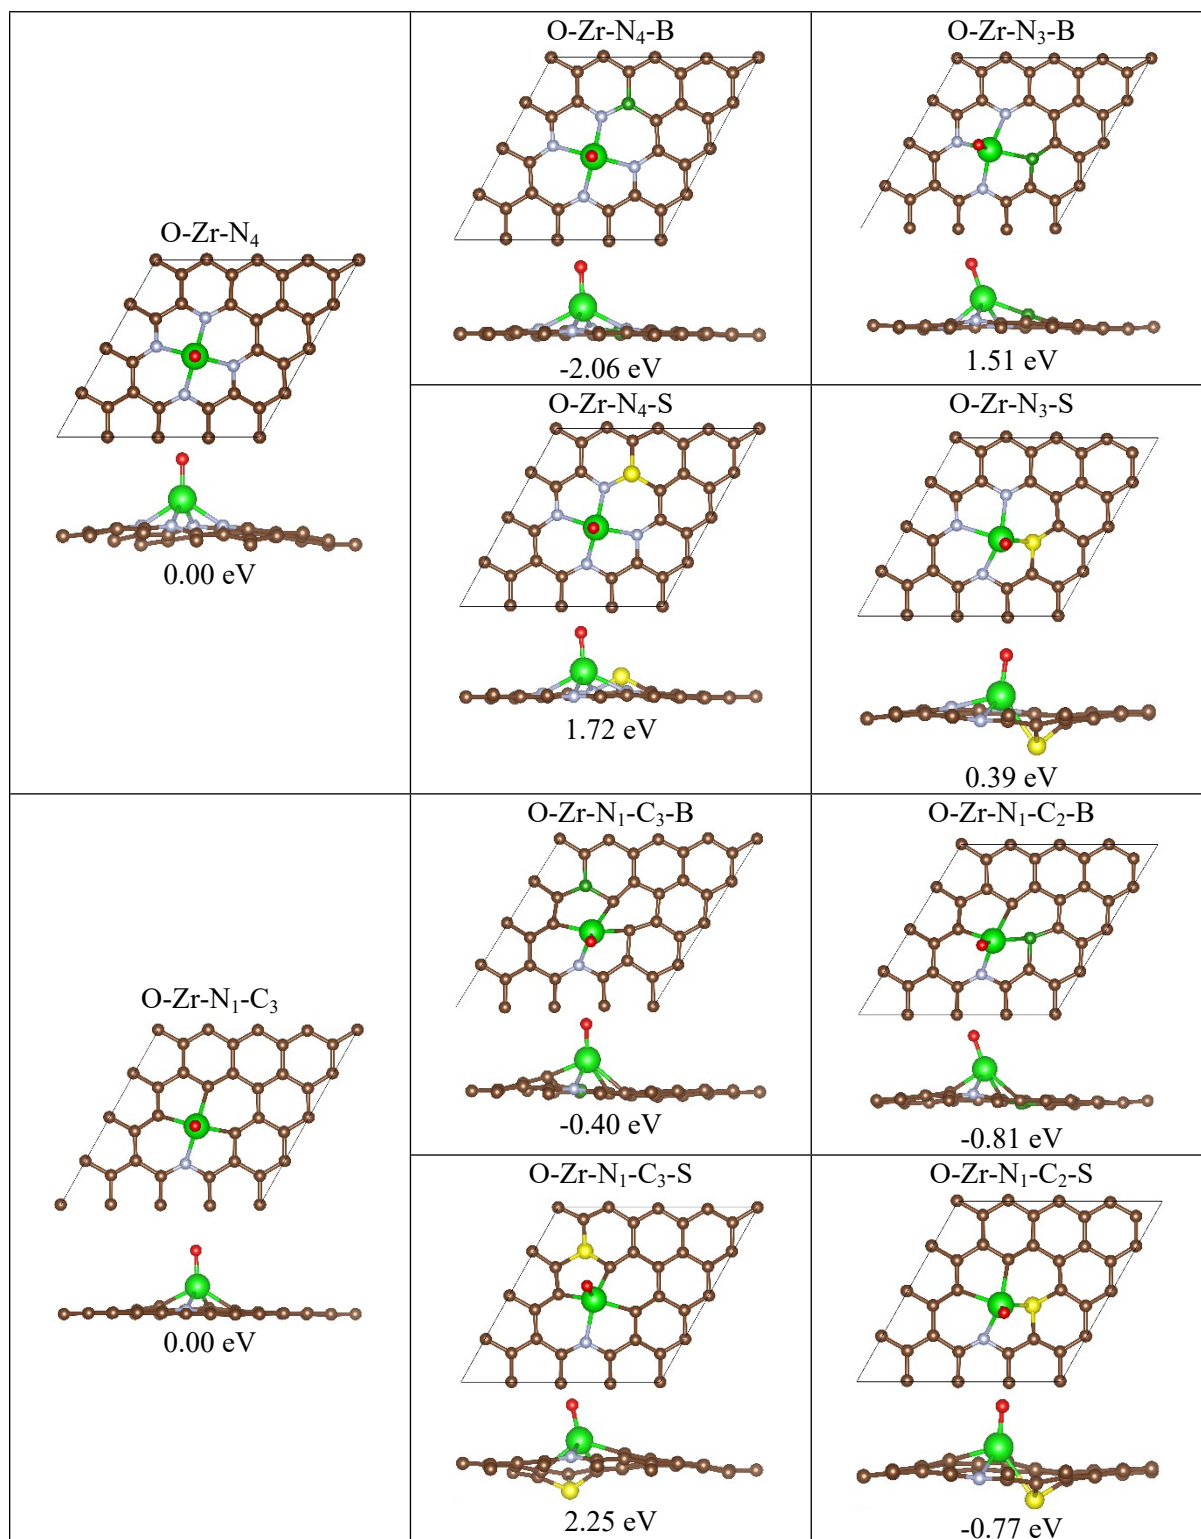

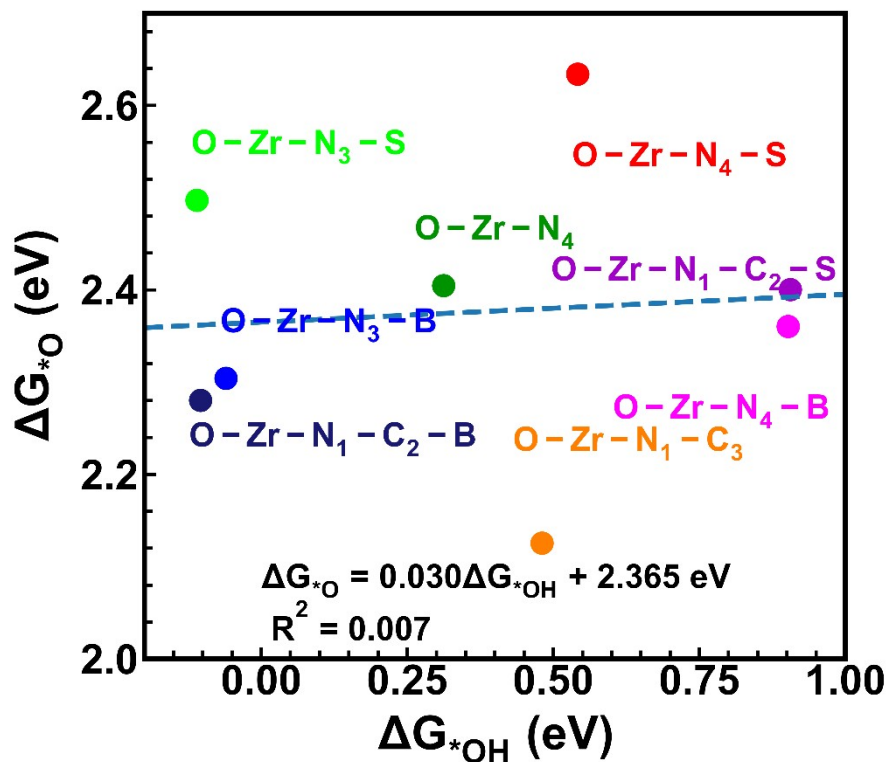

Figure S1. Relationship between  $\Delta G_{*OH}$  and  $\Delta G_{*O}$

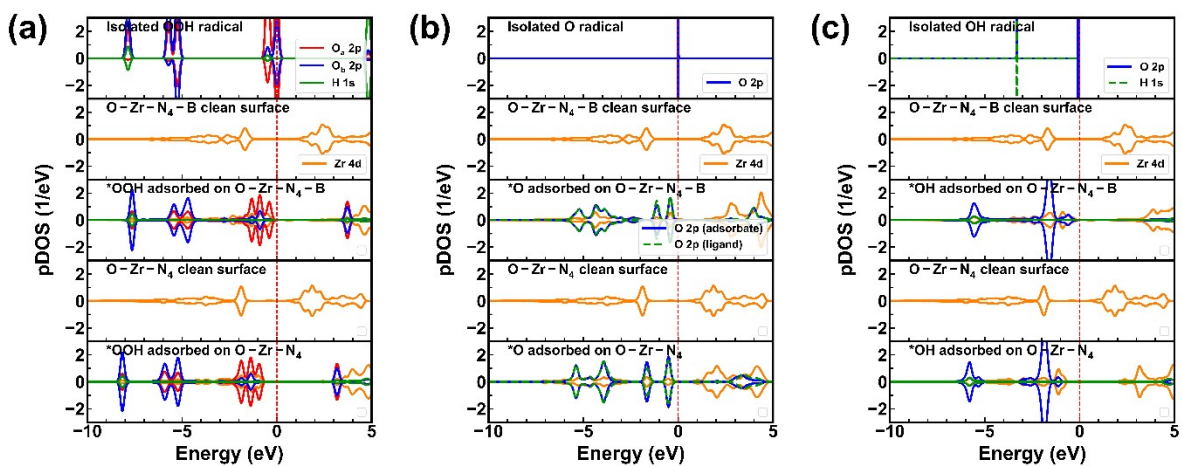

Figure S2. Comparison of projected density of states of isolated radical, clean surface of O-Zr-N<sub>4</sub>-B and O-Zr-N<sub>4</sub>, and surface after adsorption of (a) OOH, (b) O, (c) OH intermediate

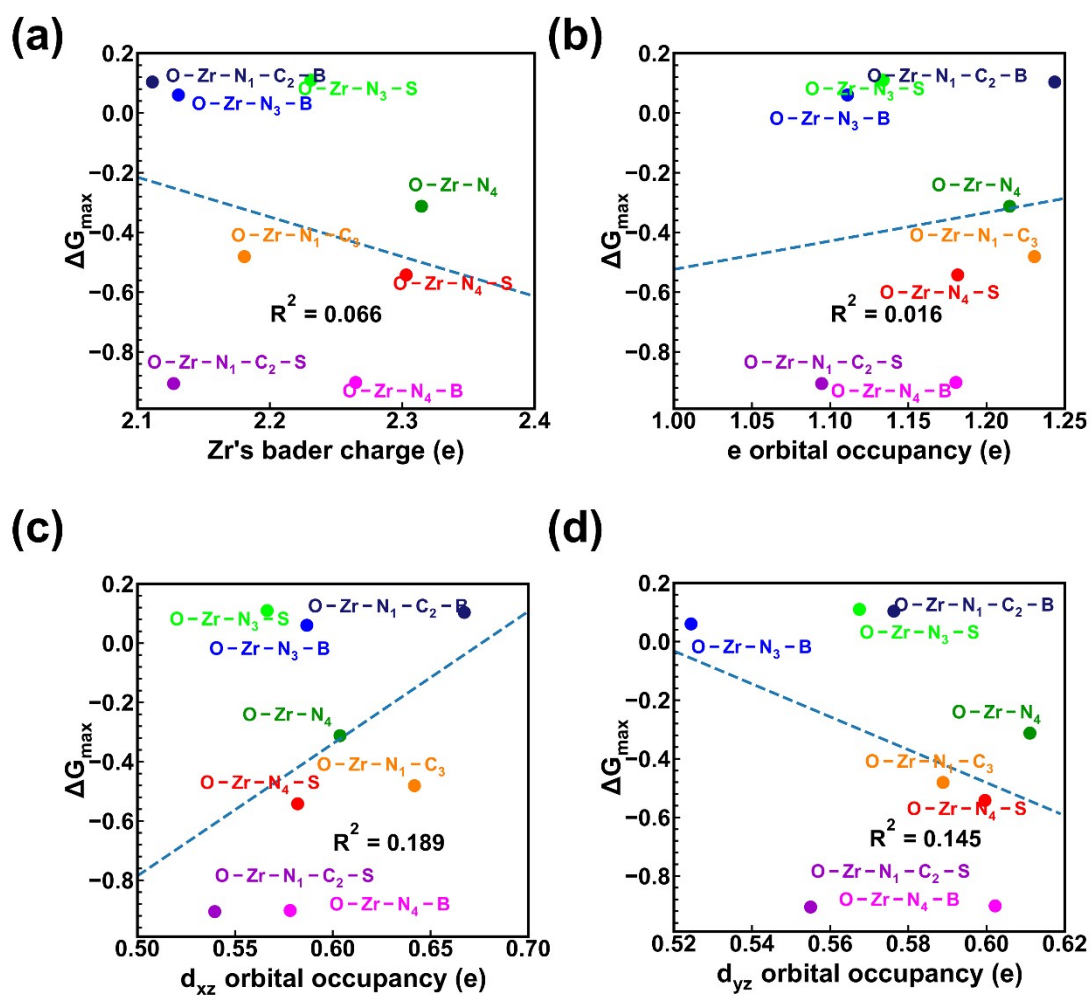

Figure S3. Relationship of Zr's Bader charge with  $\Delta G_{max}$

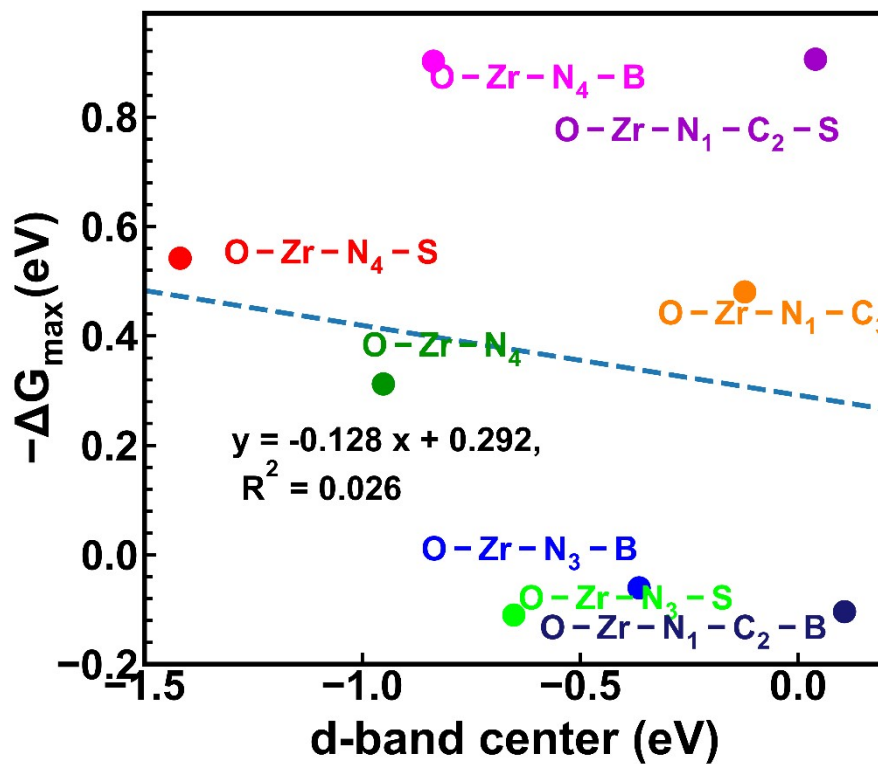

Figure S4. Relationship between d-band center and  $-\Delta G_{\max}$

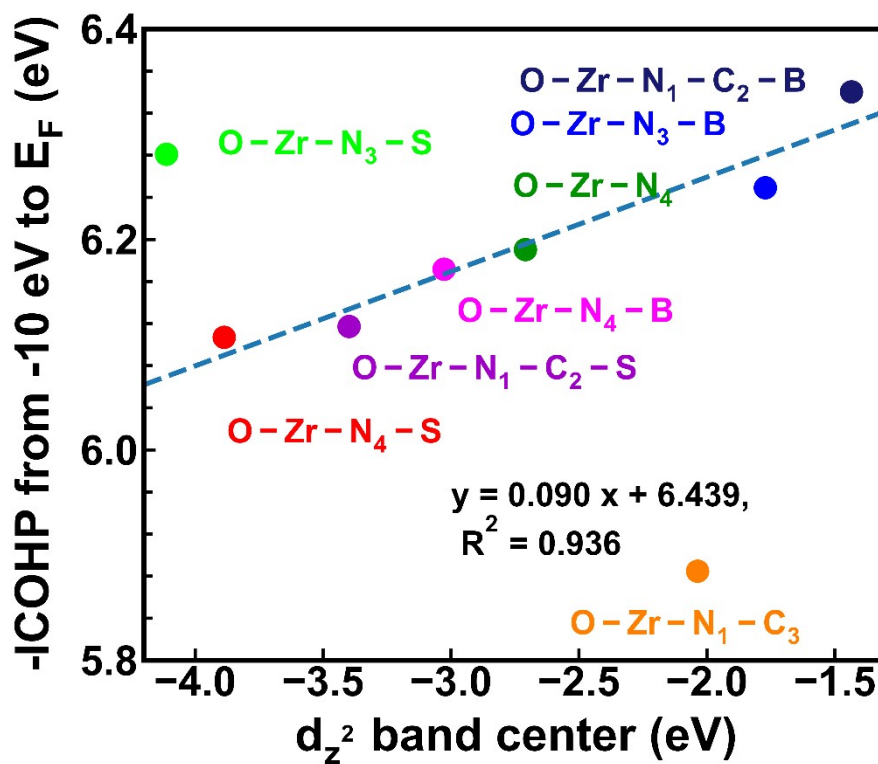

Figure S5. Relationship between  $d_{z^2}$  band center and -ICOHP of Zr-O bond from -10 eV to  $E_F$

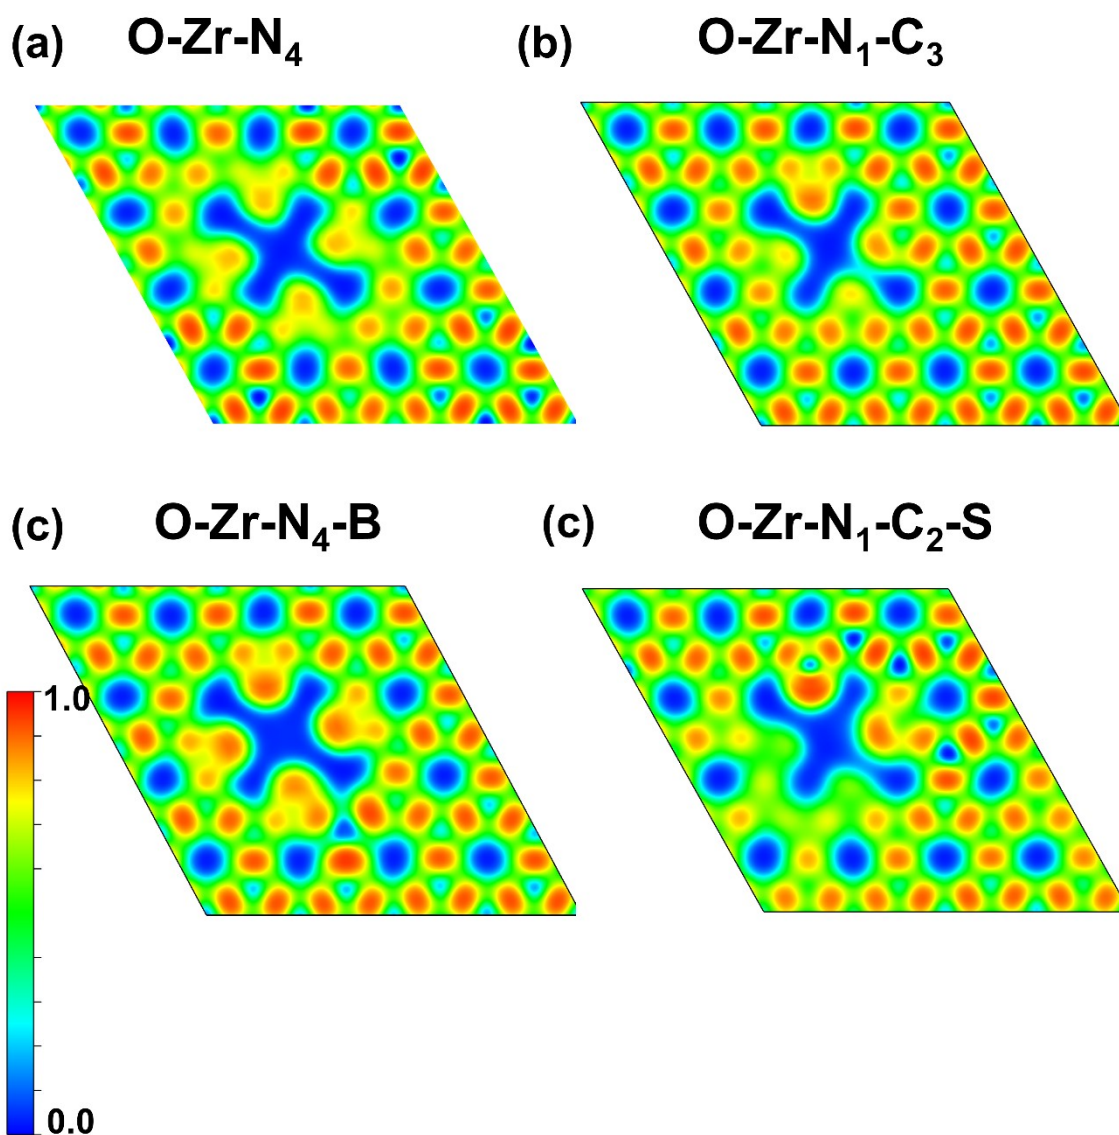

Figure S6. Electron localization function of (a) O-Zr-N<sub>4</sub>, (b) O-Zr-N<sub>1</sub>-C<sub>3</sub>, (c) O-Zr-N<sub>4</sub>-B, and (d) O-Zr-N<sub>1</sub>-C<sub>2</sub>-S site

Table S2. Valence charge of adsorbed OOH and Zr atom on O-Zr-N<sub>4</sub>-B obtained using Bader charge analysis

|                   | Number of valence charge (e) |                |                |        |
|-------------------|------------------------------|----------------|----------------|--------|
|                   | Zr                           | O <sub>a</sub> | O <sub>b</sub> | H      |
| Before adsorption | 9.74                         | 6.55           | 6.09           | 0.368  |
| After adsorption  | 9.66                         | 6.56           | 6.71           | 0.365  |
| $\Delta e$        | -0.08                        | 0.01           | 0.62           | -0.002 |

Table S3. Valence charge of adsorbed OOH and Zr atom on O-Zr-N<sub>4</sub> obtained using Bader charge analysis

|                   | Number of valence charge (e) |                |                |        |
|-------------------|------------------------------|----------------|----------------|--------|
|                   | Zr                           | O <sub>a</sub> | O <sub>b</sub> | H      |
| Before adsorption | 9.68                         | 6.55           | 6.09           | 0.368  |
| After adsorption  | 9.69                         | 6.57           | 6.72           | 0.360  |
| $\Delta e$        | 0.01                         | 0.02           | 0.63           | -0.007 |

Table S4. Valence charge of adsorbed O and Zr atom on O-Zr-N<sub>4</sub>-B obtained using Bader charge analysis

|                   | Number of valence charge (e) |      |
|-------------------|------------------------------|------|
|                   | Zr                           | O    |
| Before adsorption | 9.74                         | 6.00 |
| After adsorption  | 9.64                         | 6.58 |
| $\Delta e$        | -0.10                        | 0.58 |

Table S5. Valence charge of adsorbed O and Zr atom on O-Zr-N<sub>4</sub> obtained using Bader charge analysis

|                   | Number of valence charge (e) |      |
|-------------------|------------------------------|------|
|                   | Zr                           | O    |
| Before adsorption | 9.68                         | 6.00 |
| After adsorption  | 9.63                         | 6.60 |
| $\Delta e$        | -0.05                        | 0.60 |

Table S6. Valence charge of adsorbed OH and Zr atom on O-Zr-N<sub>4</sub>-B obtained using Bader charge analysis

|                   | Number of valence charge (e) |      |       |
|-------------------|------------------------------|------|-------|
|                   | Zr                           | O    | H     |
| Before adsorption | 9.74                         | 6.59 | 0.407 |
| After adsorption  | 9.64                         | 7.24 | 0.412 |
| $\Delta e$        | -0.10                        | 0.65 | 0.005 |

Table S7. Valence charge of adsorbed OH and Zr atom on O-Zr-N<sub>4</sub> obtained using Bader charge analysis

|                   | Number of valence charge (e) |      |        |
|-------------------|------------------------------|------|--------|
|                   | Zr                           | O    | H      |
| Before adsorption | 9.68                         | 6.59 | 0.407  |
| After adsorption  | 9.64                         | 7.27 | 0.401  |
| $\Delta e$        | -0.04                        | 0.68 | -0.006 |

Table S8. Optimized structures of each intermediate adsorption.

| Active site                         | *O                                                                                  | *OH                                                                                  | *OOH                                                                                  |
|-------------------------------------|-------------------------------------------------------------------------------------|--------------------------------------------------------------------------------------|---------------------------------------------------------------------------------------|
| O-Zr-N <sub>4</sub>                 | 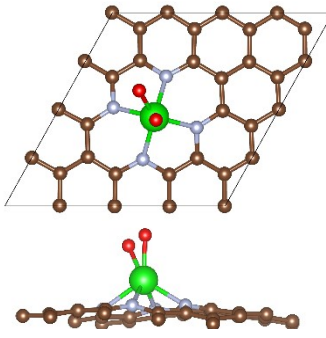   | 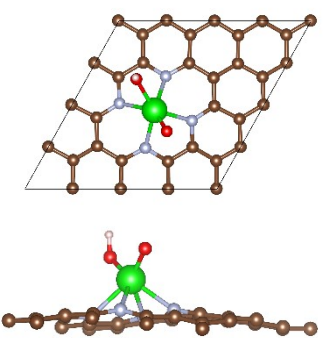   | 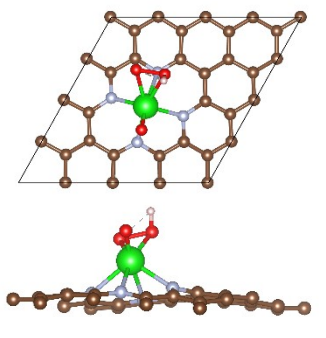   |
| O-Zr-N <sub>1</sub> -C <sub>3</sub> | 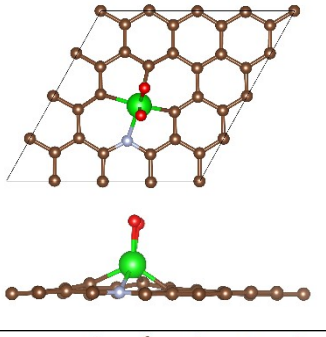  | 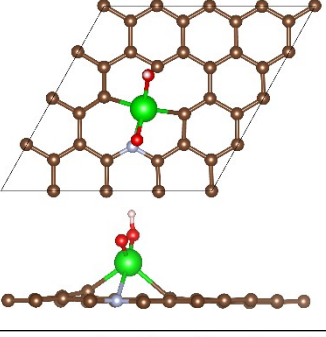  | 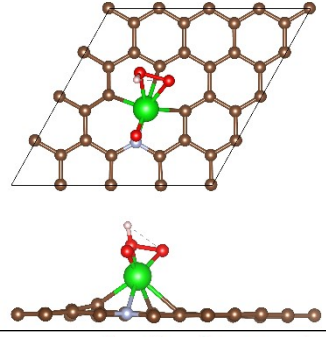  |
| O-Zr-N <sub>4</sub> -B              | 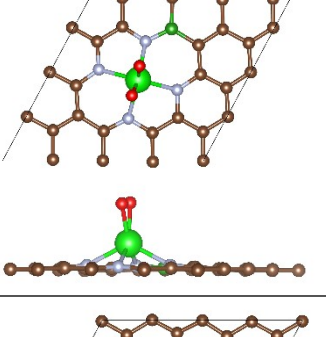 | 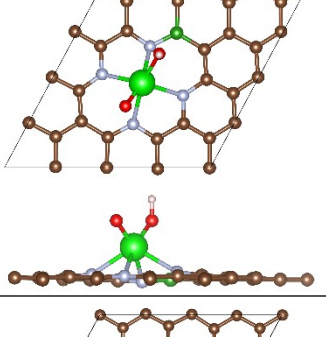 | 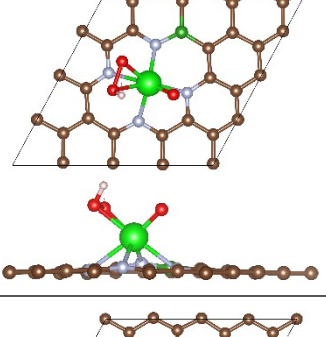 |
| O-Zr-N <sub>4</sub> -S              | 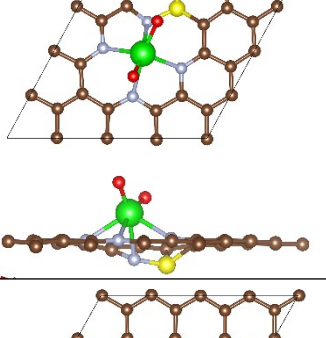 | 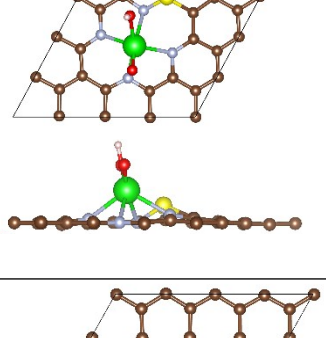 | 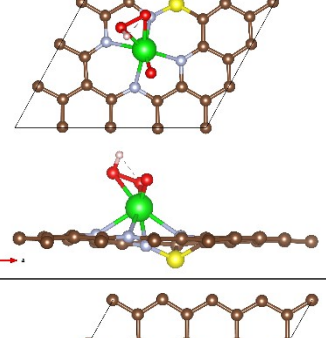 |
| O-Zr-N <sub>3</sub> -B              | 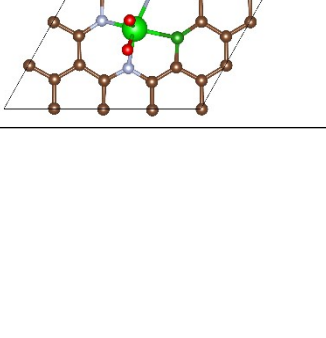 | 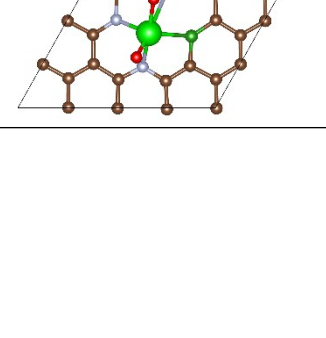 | 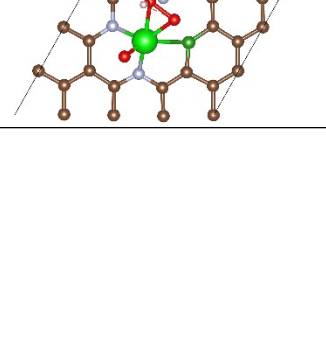 |

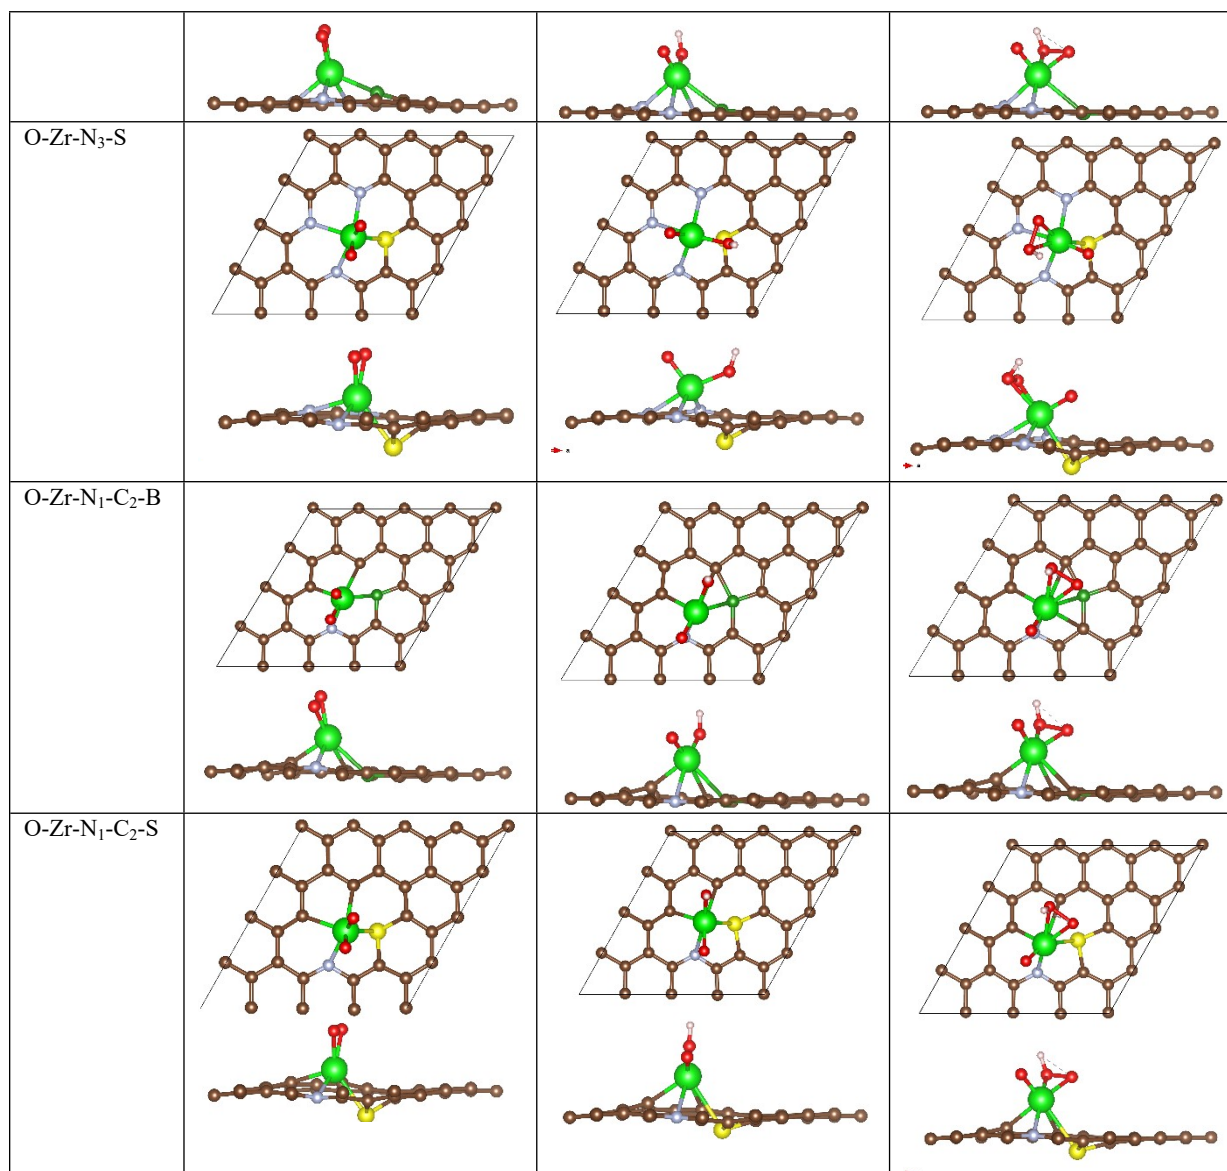

## References

1. Ge, X.; Sumboja, A.; Wu, D.; An, T.; Li, B.; Goh, F. W. T.; Hor, T. S. A.; Zong, Y.; Liu, Z., Oxygen Reduction in Alkaline Media: From Mechanisms to Recent Advances of Catalysts. *ACS Catalysis* **2015**, 5, 4643-4667.
2. Ong, S. P.; Richards, W. D.; Jain, A.; Hautier, G.; Kocher, M.; Cholia, S.; Gunter, D.; Chevrier, V. L.; Persson, K. A.; Ceder, G., Python Materials Genomics (Pymatgen): A Robust, Open-Source Python Library for Materials Analysis. *Computational Materials Science* **2013**, 68, 314-319.
